# Supplementary material for: Computational Insights into the Potential of Withaferin-A, Withanone and Caffeic Acid Phenethyl Ester for Treatment of Aberrant-EGFR Driven Lung Cancers
Source: MDPI journal article supplement (doi:10.3390/biom11020160), 2021-01-26

**A****EGFR D770\_N771<sup>InsSVD</sup>-Poziotinib complex Protein RMSD**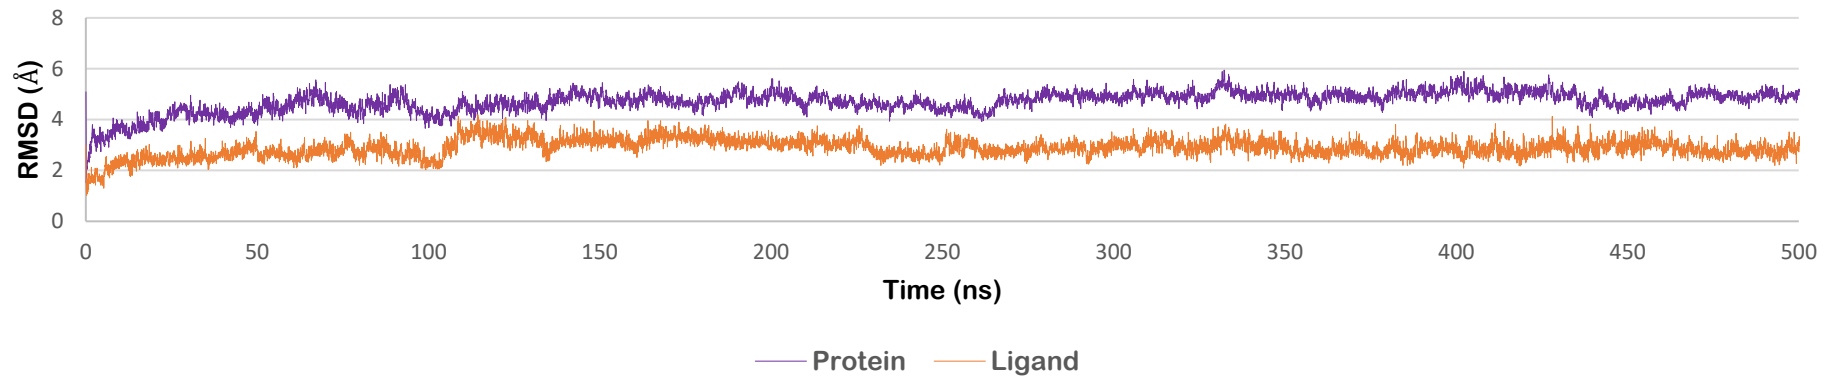**B**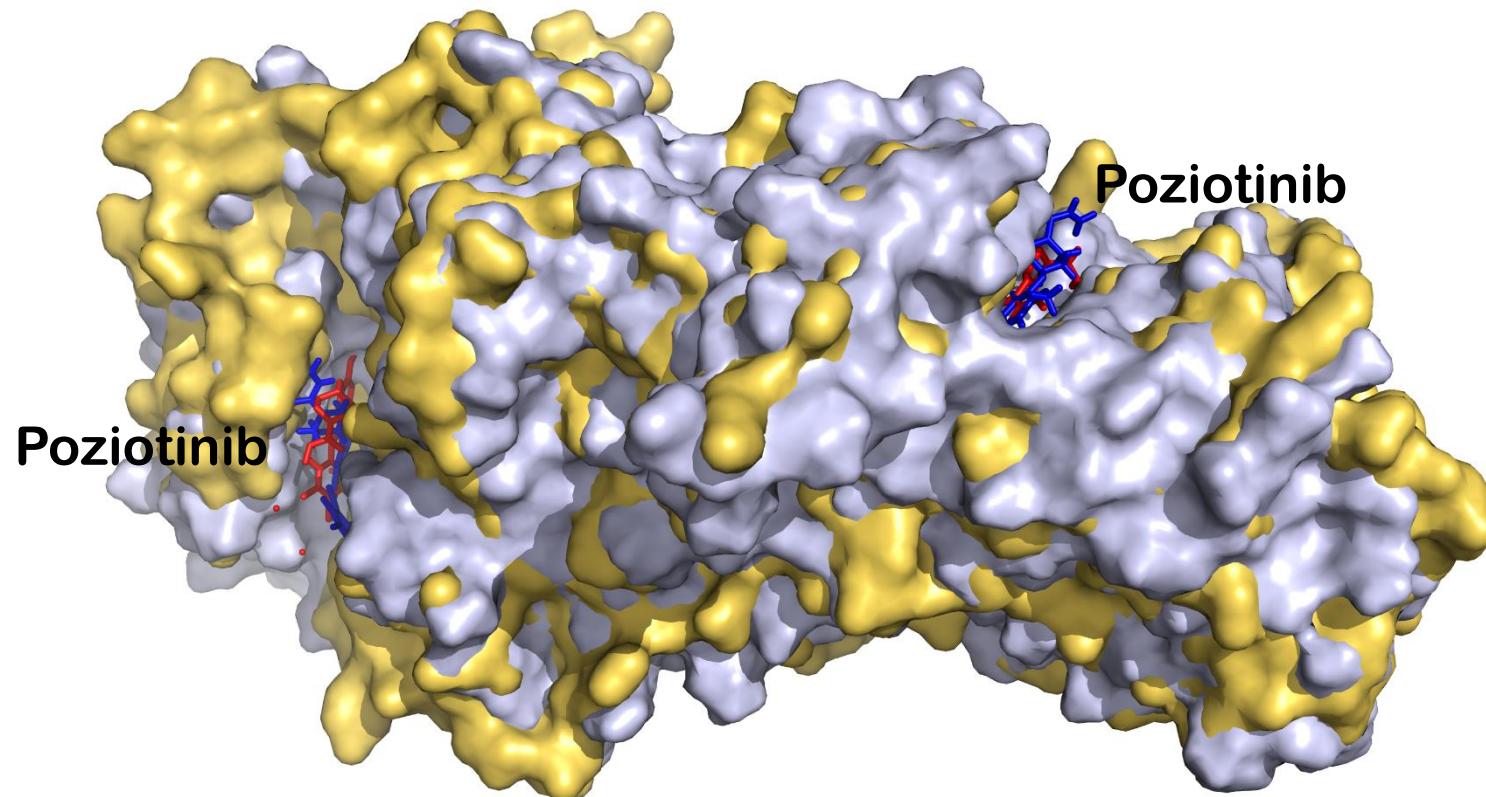

**A****Protein RMSD**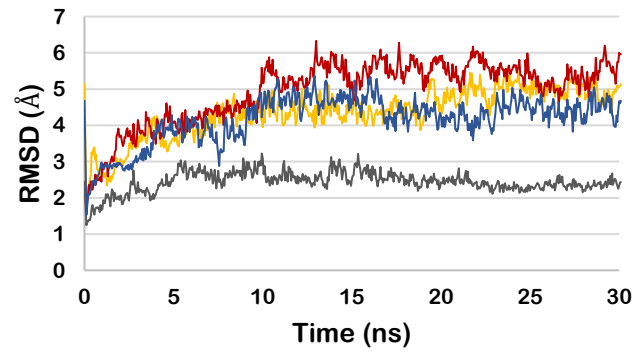**B****EGFR\_D770\_N771InsNPG Protein RMSD**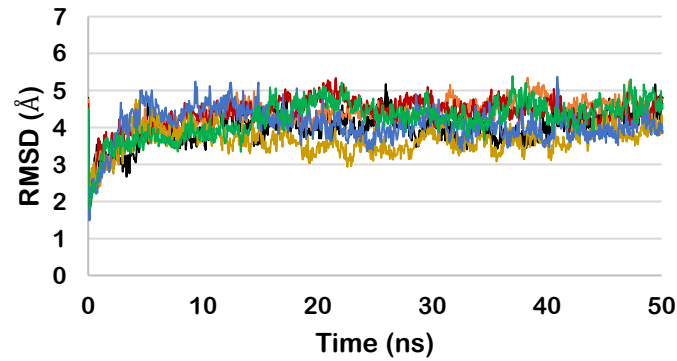**C****EGFR\_D770\_N771InsSVD Protein RMSD**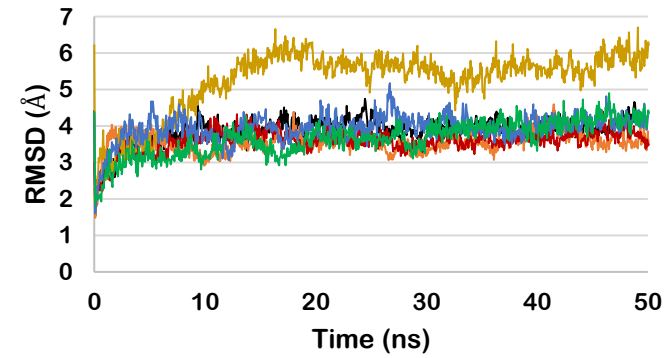**D****EGFR\_V769\_D770InsASV Protein RMSD**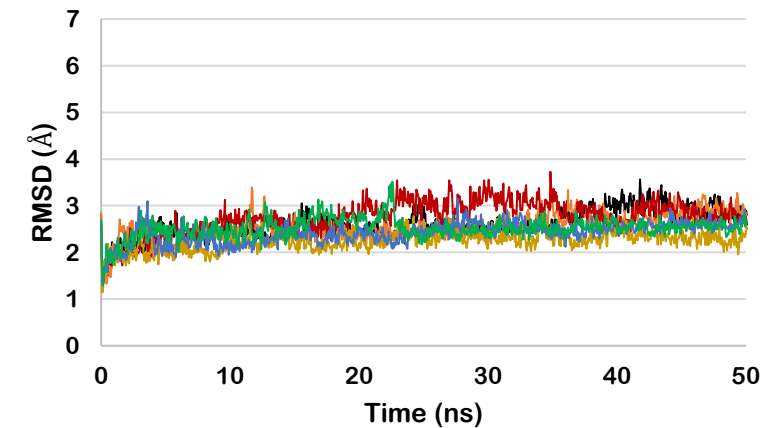**E****EGFR\_H773\_V774InsH Protein RMSD**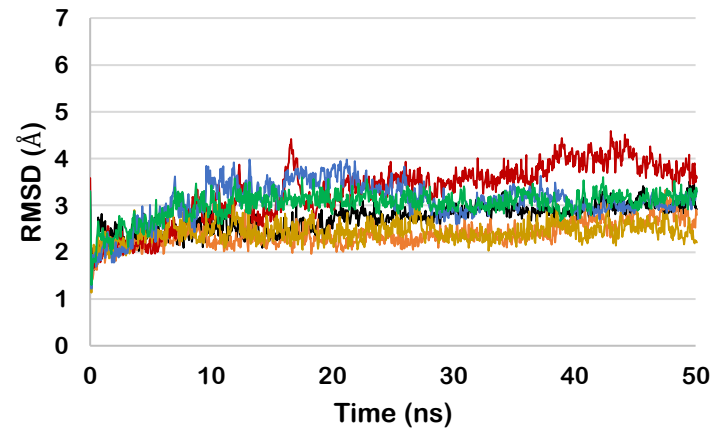

Color Key for image B-E

- Erlotinib
- Pozotinib
- TAS-6417
- CAPE
- Wi-A
- Wi-N

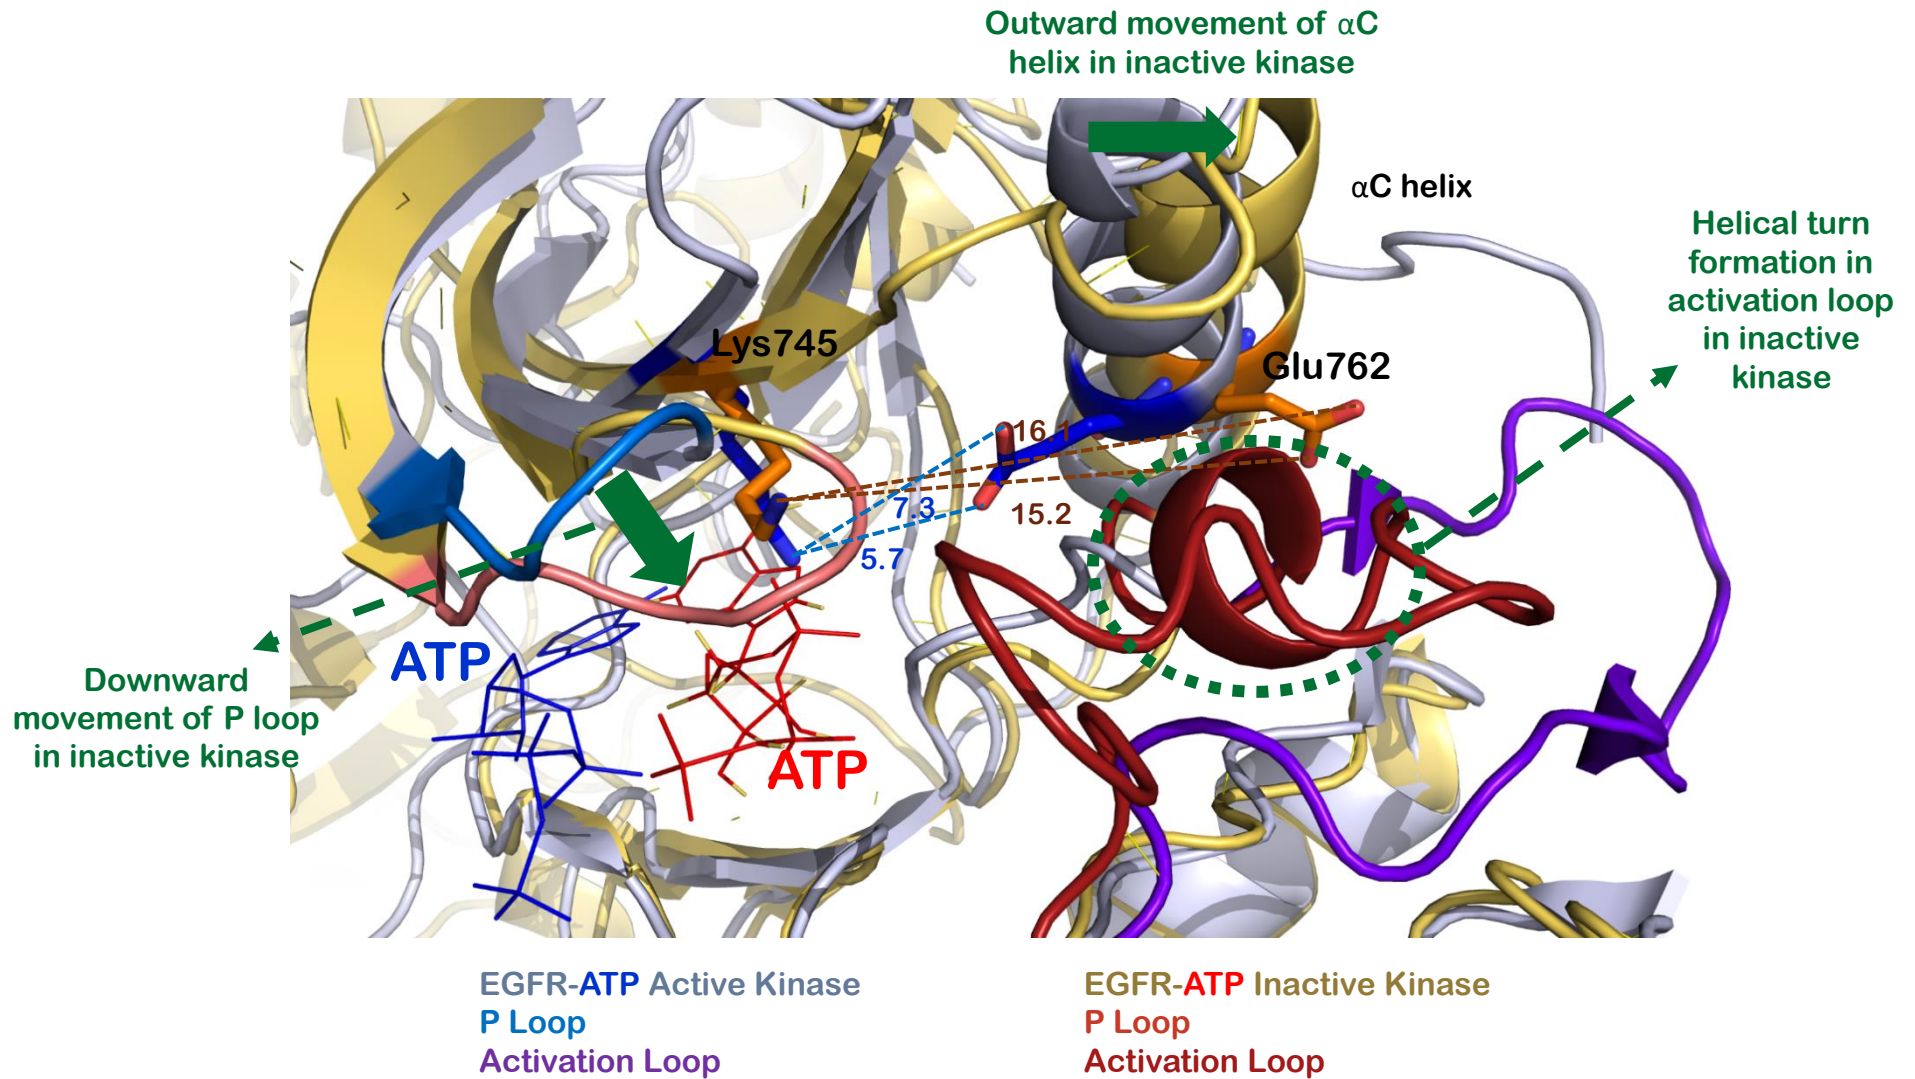

EGFR L858R-  
inhibitor-ATP complexEGFR exon19del-  
inhibitor-ATP complexEGFR wild type-  
inhibitor-ATP complex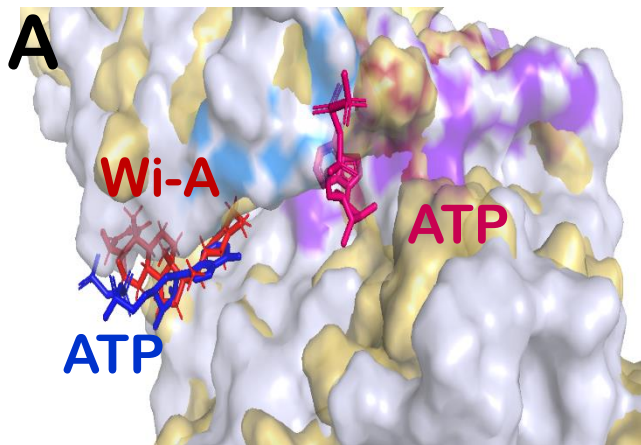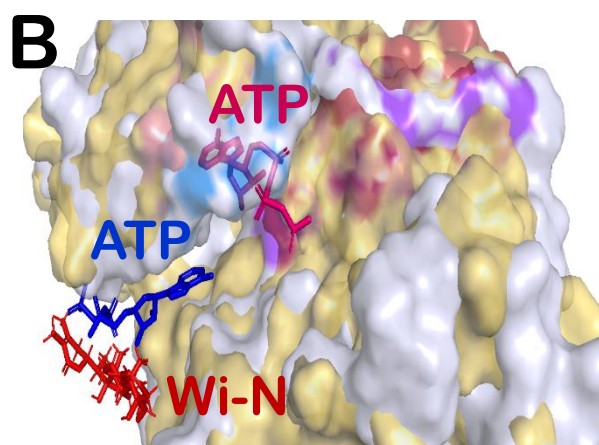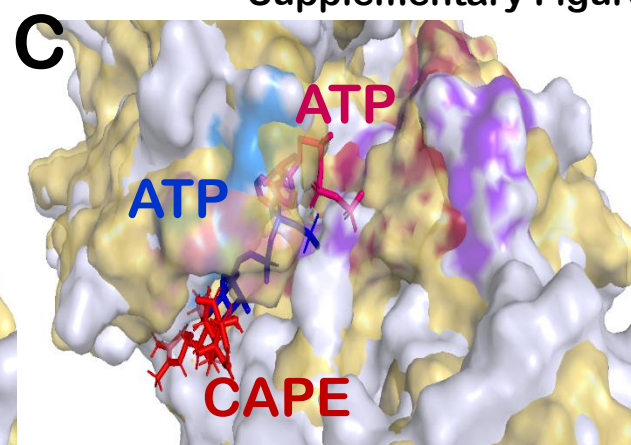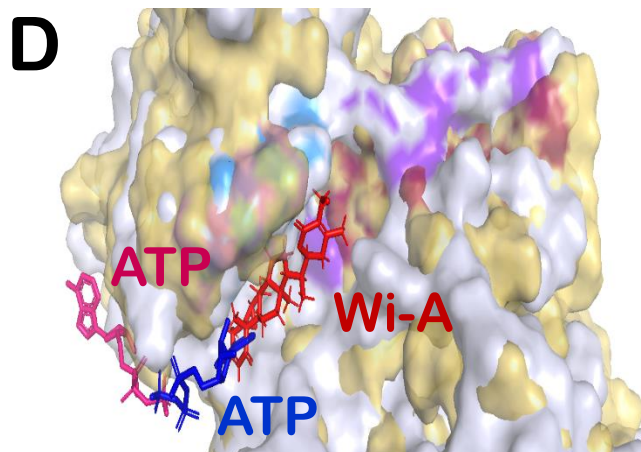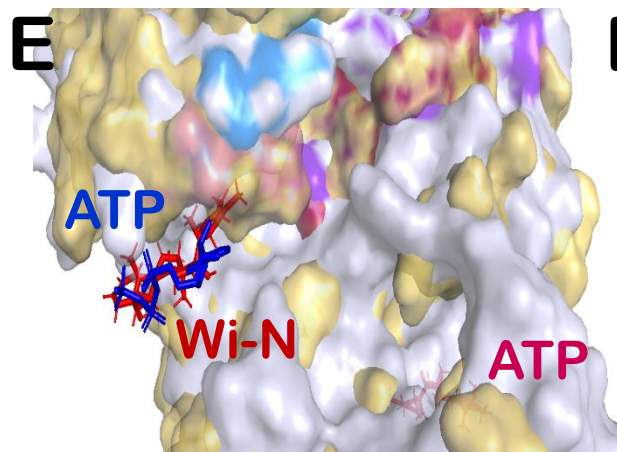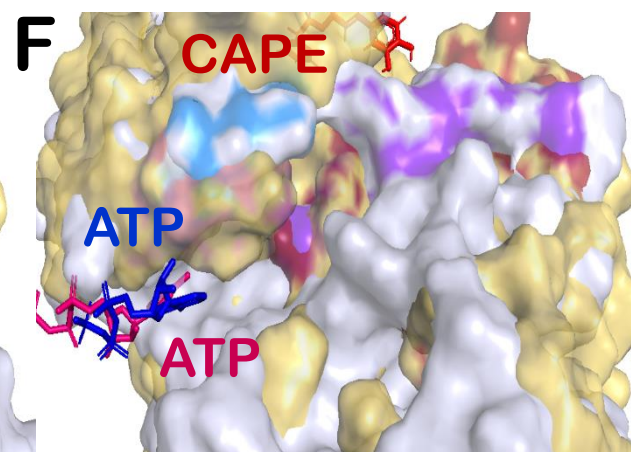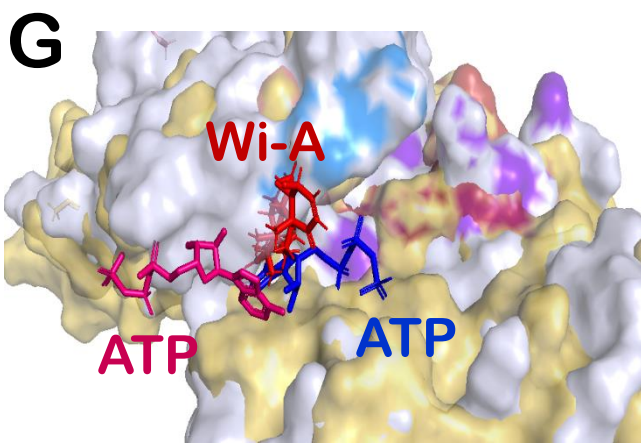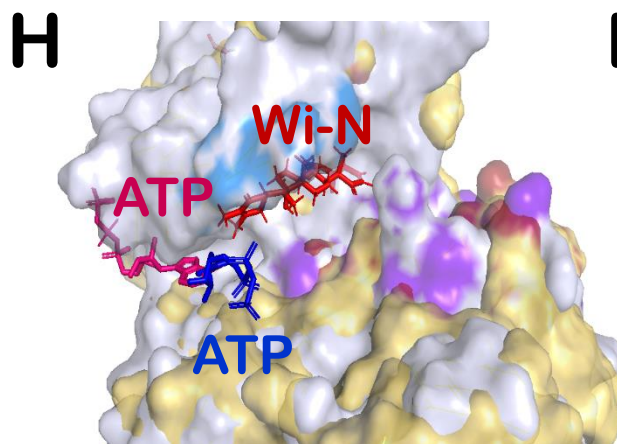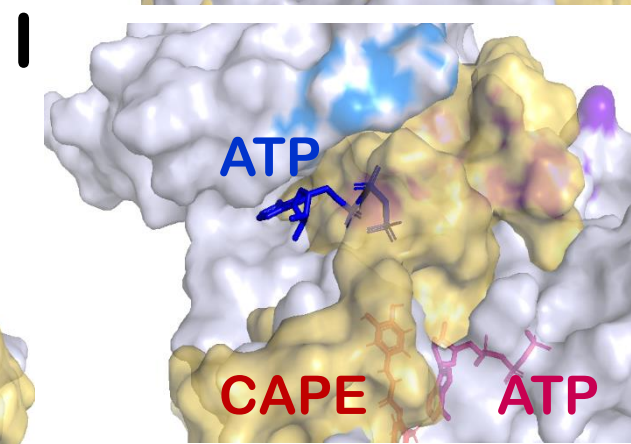

Supplement: s1 [file s1]
