# Supplementary figures and images for: Computational Insights into the Potential of Withaferin-A, Withanone and Caffeic Acid Phenethyl Ester for Treatment of Aberrant-EGFR Driven Lung Cancers
Source: MDPI journal article supplement (doi:10.3390/biom11020160), 2021-01-26

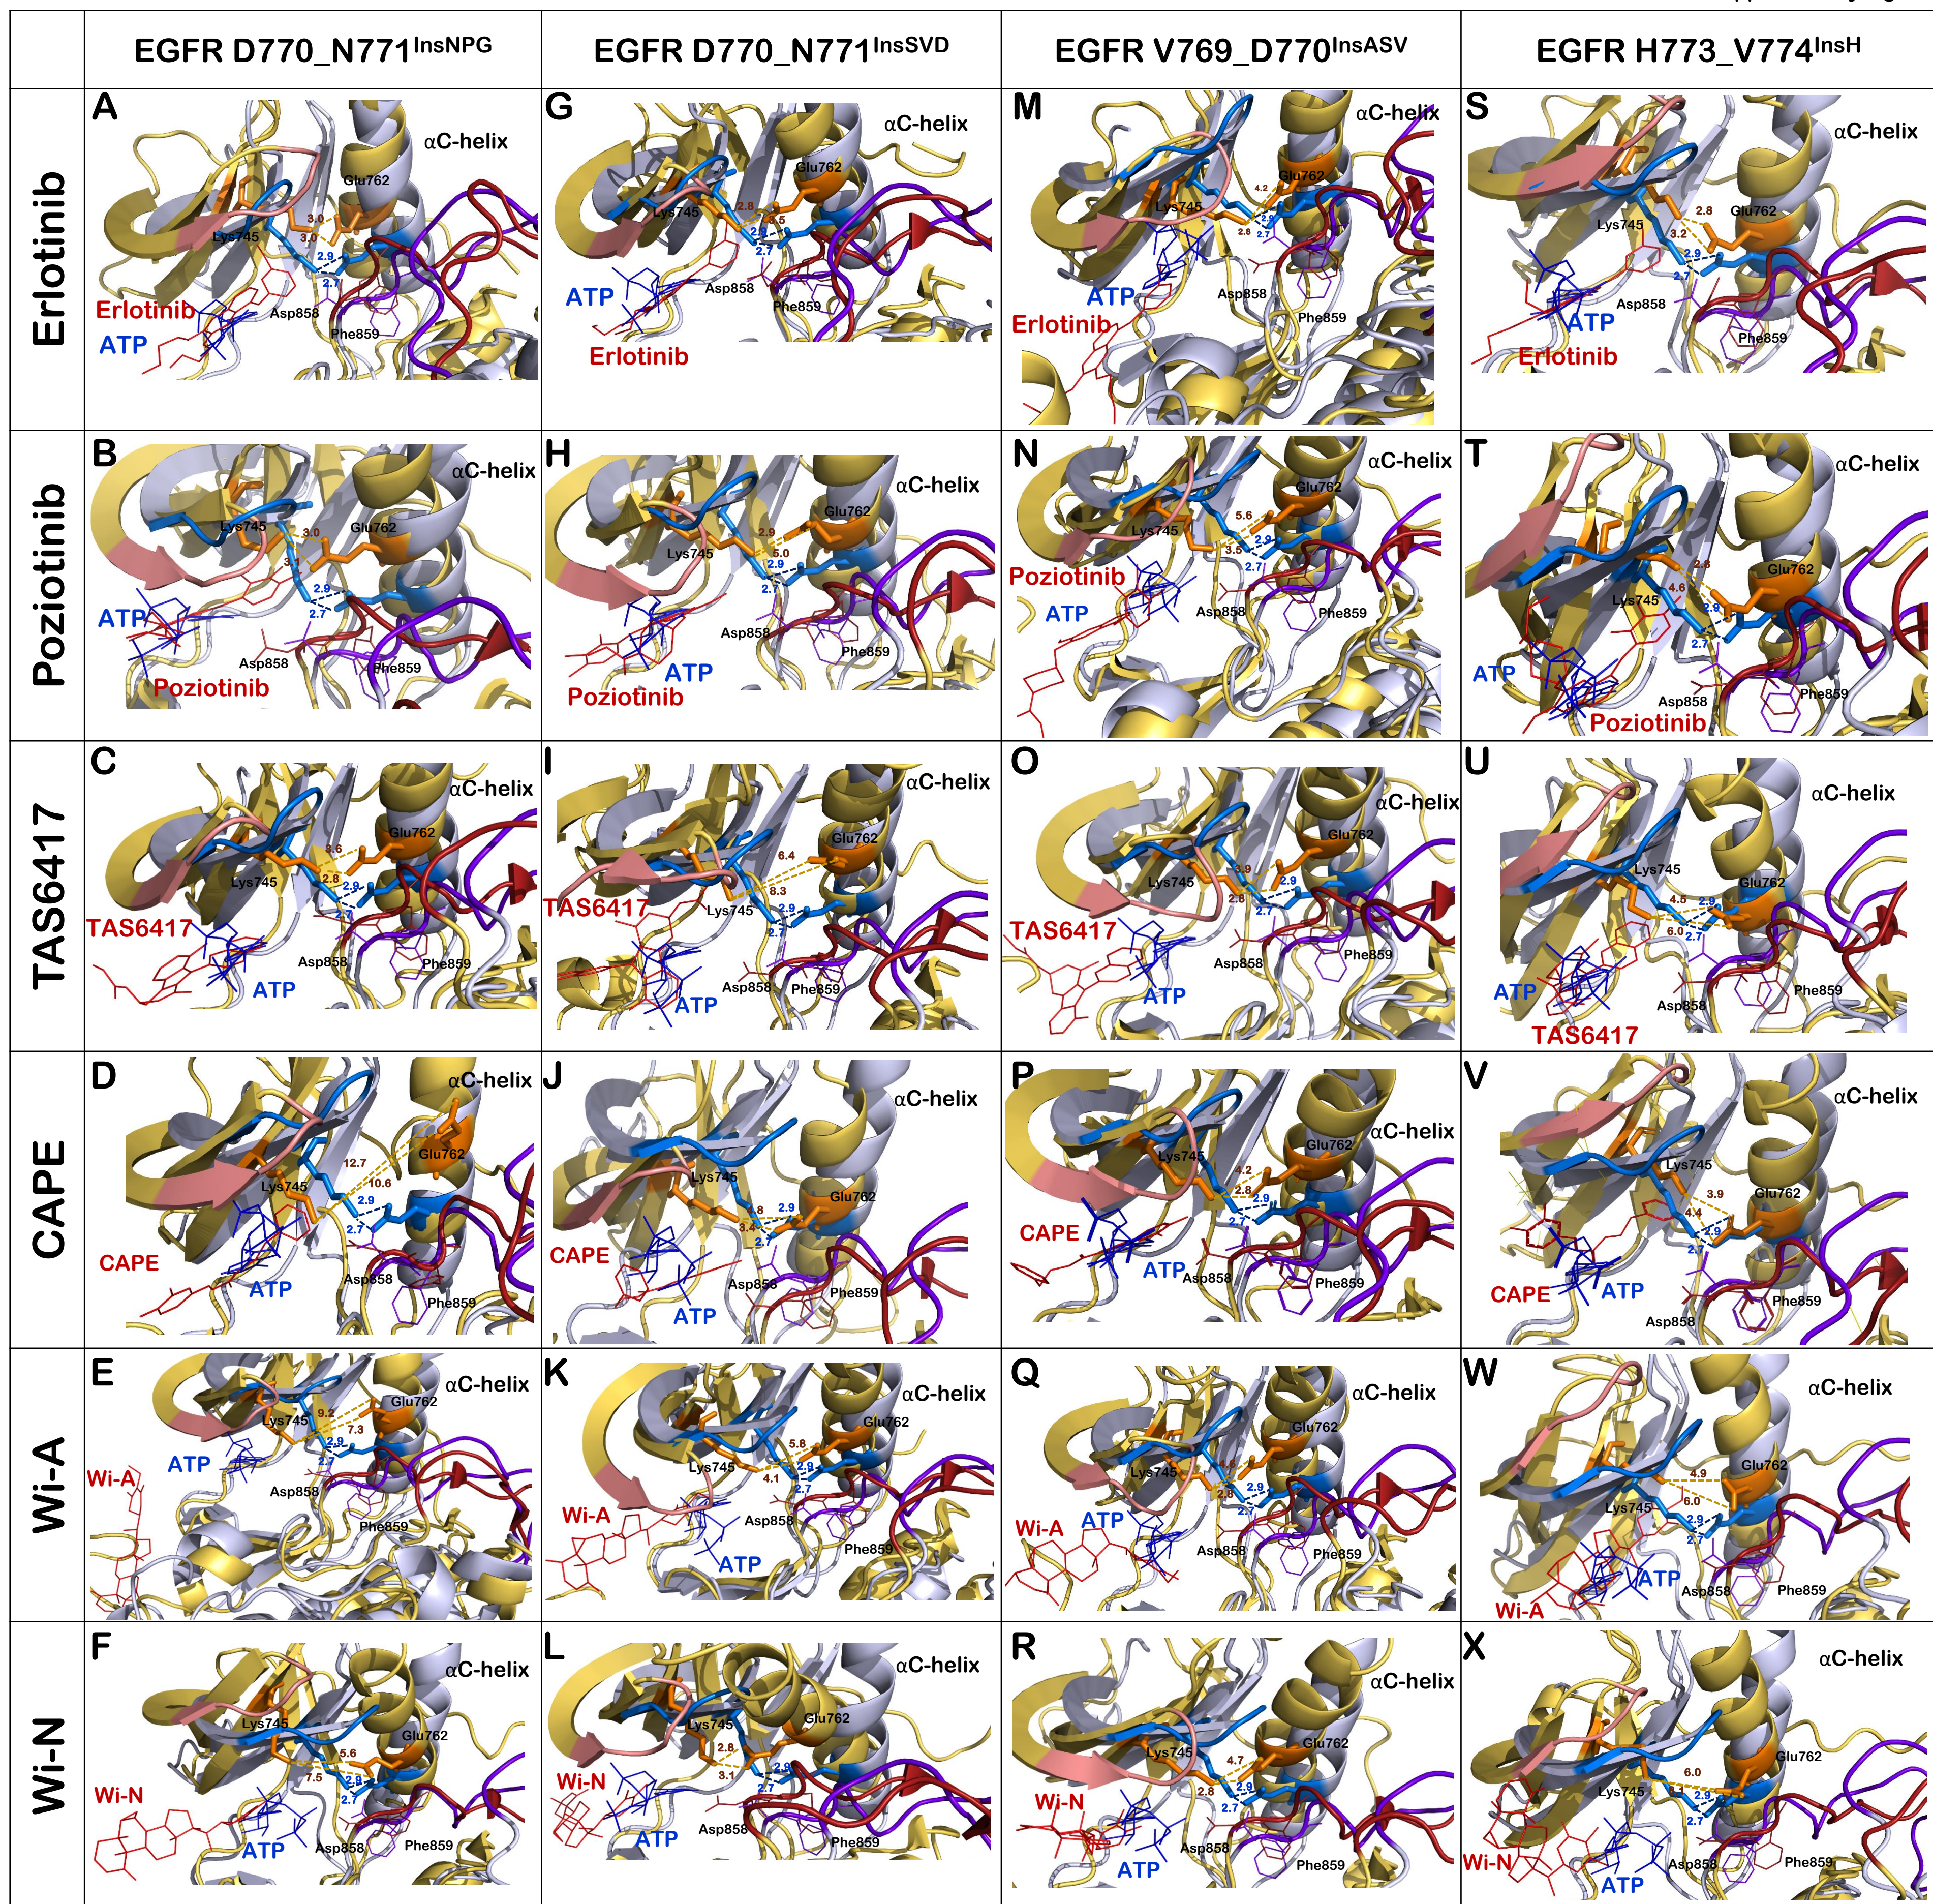

Supplement: s1 [file s1]
